# Supplementary material for: Density functional theory study of the substituent effect on the structure, conformation and vibrational spectra in halosubstituted anilines
Source: Royal Society of Chemistry journal article supplement (doi:10.1039/c6ra11908e), 2016-01-01
Supplement: c6ra11908e1.pdf [file c6ra11908e1.pdf]

**Table S1. Calculated and experimental inversion barriers (kcal mol<sup>-1</sup>) for aniline and its mono-halosubstituted derivatives.<sup>a</sup>**

| Aniline  | B3LYP           |                 |                 | MP2             |                 |                 | Experimental                                                                  |                              |                              |
|----------|-----------------|-----------------|-----------------|-----------------|-----------------|-----------------|-------------------------------------------------------------------------------|------------------------------|------------------------------|
|          | F               | Cl              | Br              | F               | Cl              | Br              | F                                                                             | Cl                           | Br                           |
|          | 0.78            |                 |                 | 2.32            |                 |                 | 1.47 <sup>b</sup> , 1.61 <sup>c</sup> , 1.29 <sup>d</sup> , 1.50 <sup>e</sup> |                              |                              |
| <b>o</b> | 0.64<br>(-0.14) | 0.46<br>(-0.32) | 0.45<br>(-0.33) | 2.08<br>(-0.24) | 2.18<br>(-0.14) | 2.21<br>(-0.11) | 1.49 <sup>f</sup><br>(-0.01)                                                  | 1.18 <sup>f</sup><br>(-0.32) | 1.10 <sup>f</sup><br>(-0.40) |
| <b>m</b> | 0.63<br>(-0.15) | 0.63<br>(-0.15) | 0.65<br>(-0.13) | 2.04<br>(-0.28) | 2.14<br>(-0.18) | 2.13<br>(-0.19) | 1.31 <sup>f</sup><br>(-0.19)                                                  | 1.30 <sup>f</sup><br>(-0.20) | 1.30 <sup>f</sup><br>(-0.20) |
| <b>p</b> | 0.90<br>(+0.12) | 0.72<br>(-0.06) | 0.69<br>(-0.09) | 2.41<br>(+0.09) | 2.36<br>(+0.04) | 2.34<br>(+0.02) | 1.72 <sup>f</sup><br>(+0.22)                                                  | 1.48 <sup>f</sup><br>(-0.02) | 1.47 <sup>f</sup><br>(-0.03) |

<sup>a</sup> Values in parentheses are the inversion barrier differences between aniline and its halo-derivatives.

<sup>b</sup> Ref. 38, microwave

<sup>c</sup> Ref. 44, vibrational IR

<sup>d</sup> Ref. 45, fluorescence

<sup>e</sup> Ref. 46, far-IR

<sup>f</sup> Ref. 47, far-IR

**Table S2. Calculated and gas-phase experimental bond lengths (Å) and bond angles (degrees) for aniline, selected fluoroanilines and chloroanilines.**

|                              |                   | N-H               | N-C <sup>g</sup> | (C-C) <sub>avg</sub> | H-N-H <sup>g</sup> |
|------------------------------|-------------------|-------------------|------------------|----------------------|--------------------|
| Aniline                      | Exp. <sup>a</sup> | 1.001             | 1.402            | 1.396                | 111.2              |
|                              | Cal.              | 1.009             | 1.398            | 1.396                | 112.2              |
| <i>o</i> -Fluoroaniline      | Exp. <sup>b</sup> | 0.998             | <i>1.410</i>     | 1.392                | <i>111.0</i>       |
|                              | Cal.              | 1.009             | 1.391            | 1.394                | 113.3              |
| <i>m</i> -Fluoroaniline      | Exp. <sup>c</sup> | 1.00 <sup>e</sup> | 1.403            | 1.392                | 115.0              |
|                              | Cal.              | 1.009             | 1.394            | 1.394                | 112.6              |
| <i>p</i> -Fluoroaniline      | Exp. <sup>d</sup> | 1.02              | 1.420            | 1.390                | 111.9              |
|                              | Cal.              | 1.010             | 1.401            | 1.393                | 111.8              |
| <i>o,o'</i> -Difluoroaniline | Exp. <sup>b</sup> | 1.003             | 1.410            | 1.390                | <i>113.0</i>       |
|                              | Cal.              | 1.009             | 1.385            | 1.392                | 114.7              |
| <i>o</i> -Chloroaniline      | Exp. <sup>e</sup> | 1.004             |                  |                      | 113.8              |
|                              | Cal.              | 1.009             | 1.386            | 1.396                | 114.0              |
| <i>m</i> -Chloroaniline      | Exp. <sup>f</sup> | 1.001             | 1.399            | 1.397                | 114                |
|                              | Cal.              | 1.009             | 1.394            | 1.395                | 112.6              |

<sup>a</sup> Refs. 38,39

<sup>b</sup> Ref. 54

<sup>c</sup> Ref. 41

<sup>d</sup> Refs. 51,52

<sup>e</sup> Ref. 42

<sup>f</sup> Ref. 53

<sup>g</sup> Assumed values used in relevant refs. are shown in italic.

**Table S3. NBO analysis of the C<sub>1</sub>-N<sub>7</sub> bond in aniline, fluoroanilines, chloroanilines and bromoanilines.**

| Molecule    | Fluoroanilines                                                             | Chloroanilines                                                             | Bromoanilines                                                              |
|-------------|----------------------------------------------------------------------------|----------------------------------------------------------------------------|----------------------------------------------------------------------------|
|             | Average Hybridization                                                      | Average Hybridization                                                      | Average Hybridization                                                      |
| aniline     | C <sub>1</sub> (sp <sup>2.05</sup> ); N <sub>7</sub> (sp <sup>2.47</sup> ) | C <sub>1</sub> (sp <sup>2.05</sup> ); N <sub>7</sub> (sp <sup>2.47</sup> ) | C <sub>1</sub> (sp <sup>2.05</sup> ); N <sub>7</sub> (sp <sup>2.47</sup> ) |
| o           | C <sub>1</sub> (sp <sup>2.04</sup> ); N <sub>7</sub> (sp <sup>2.42</sup> ) | C <sub>1</sub> (sp <sup>2.04</sup> ); N <sub>7</sub> (sp <sup>2.38</sup> ) | C <sub>1</sub> (sp <sup>2.04</sup> ); N <sub>7</sub> (sp <sup>2.37</sup> ) |
| m           | C <sub>1</sub> (sp <sup>2.04</sup> ); N <sub>7</sub> (sp <sup>2.43</sup> ) | C <sub>1</sub> (sp <sup>2.04</sup> ); N <sub>7</sub> (sp <sup>2.43</sup> ) | C <sub>1</sub> (sp <sup>2.04</sup> ); N <sub>7</sub> (sp <sup>2.43</sup> ) |
| p           | C <sub>1</sub> (sp <sup>2.04</sup> ); N <sub>7</sub> (sp <sup>2.49</sup> ) | C <sub>1</sub> (sp <sup>2.05</sup> ); N <sub>7</sub> (sp <sup>2.45</sup> ) | C <sub>1</sub> (sp <sup>2.05</sup> ); N <sub>7</sub> (sp <sup>2.45</sup> ) |
| o,m         | C <sub>1</sub> (sp <sup>2.04</sup> ); N <sub>7</sub> (sp <sup>2.39</sup> ) | C <sub>1</sub> (sp <sup>2.04</sup> ); N <sub>7</sub> (sp <sup>2.35</sup> ) | C <sub>1</sub> (sp <sup>2.04</sup> ); N <sub>7</sub> (sp <sup>2.34</sup> ) |
| o,p         | C <sub>1</sub> (sp <sup>2.03</sup> ); N <sub>7</sub> (sp <sup>2.45</sup> ) | C <sub>1</sub> (sp <sup>2.04</sup> ); N <sub>7</sub> (sp <sup>2.37</sup> ) | C <sub>1</sub> (sp <sup>2.04</sup> ); N <sub>7</sub> (sp <sup>2.35</sup> ) |
| o,m'        | C <sub>1</sub> (sp <sup>2.03</sup> ); N <sub>7</sub> (sp <sup>2.39</sup> ) | C <sub>1</sub> (sp <sup>2.04</sup> ); N <sub>7</sub> (sp <sup>2.34</sup> ) | C <sub>1</sub> (sp <sup>2.04</sup> ); N <sub>7</sub> (sp <sup>2.33</sup> ) |
| o,o'        | C <sub>1</sub> (sp <sup>2.02</sup> ); N <sub>7</sub> (sp <sup>2.38</sup> ) | C <sub>1</sub> (sp <sup>2.03</sup> ); N <sub>7</sub> (sp <sup>2.29</sup> ) | C <sub>1</sub> (sp <sup>2.04</sup> ); N <sub>7</sub> (sp <sup>2.27</sup> ) |
| m,p         | C <sub>1</sub> (sp <sup>2.04</sup> ); N <sub>7</sub> (sp <sup>2.46</sup> ) | C <sub>1</sub> (sp <sup>2.04</sup> ); N <sub>7</sub> (sp <sup>2.42</sup> ) | C <sub>1</sub> (sp <sup>2.04</sup> ); N <sub>7</sub> (sp <sup>2.42</sup> ) |
| m,m'        | C <sub>1</sub> (sp <sup>2.04</sup> ); N <sub>7</sub> (sp <sup>2.39</sup> ) | C <sub>1</sub> (sp <sup>2.04</sup> ); N <sub>7</sub> (sp <sup>2.39</sup> ) | C <sub>1</sub> (sp <sup>2.04</sup> ); N <sub>7</sub> (sp <sup>2.39</sup> ) |
| o,m,p       | C <sub>1</sub> (sp <sup>2.03</sup> ); N <sub>7</sub> (sp <sup>2.42</sup> ) | C <sub>1</sub> (sp <sup>2.03</sup> ); N <sub>7</sub> (sp <sup>2.35</sup> ) | C <sub>1</sub> (sp <sup>2.04</sup> ); N <sub>7</sub> (sp <sup>2.33</sup> ) |
| o,m,m'      | C <sub>1</sub> (sp <sup>2.03</sup> ); N <sub>7</sub> (sp <sup>2.36</sup> ) | C <sub>1</sub> (sp <sup>2.04</sup> ); N <sub>7</sub> (sp <sup>2.31</sup> ) | C <sub>1</sub> (sp <sup>2.04</sup> ); N <sub>7</sub> (sp <sup>2.31</sup> ) |
| o,m,o'      | C <sub>1</sub> (sp <sup>2.02</sup> ); N <sub>7</sub> (sp <sup>2.36</sup> ) | C <sub>1</sub> (sp <sup>2.03</sup> ); N <sub>7</sub> (sp <sup>2.25</sup> ) | C <sub>1</sub> (sp <sup>2.04</sup> ); N <sub>7</sub> (sp <sup>2.24</sup> ) |
| o,p,m'      | C <sub>1</sub> (sp <sup>2.03</sup> ); N <sub>7</sub> (sp <sup>2.42</sup> ) | C <sub>1</sub> (sp <sup>2.03</sup> ); N <sub>7</sub> (sp <sup>2.35</sup> ) | C <sub>1</sub> (sp <sup>2.04</sup> ); N <sub>7</sub> (sp <sup>2.34</sup> ) |
| o,p,o'      | C <sub>1</sub> (sp <sup>2.02</sup> ); N <sub>7</sub> (sp <sup>2.42</sup> ) | C <sub>1</sub> (sp <sup>2.03</sup> ); N <sub>7</sub> (sp <sup>2.28</sup> ) | C <sub>1</sub> (sp <sup>2.04</sup> ); N <sub>7</sub> (sp <sup>2.26</sup> ) |
| m,p,m'      | C <sub>1</sub> (sp <sup>2.04</sup> ); N <sub>7</sub> (sp <sup>2.42</sup> ) | C <sub>1</sub> (sp <sup>2.04</sup> ); N <sub>7</sub> (sp <sup>2.40</sup> ) | C <sub>1</sub> (sp <sup>2.04</sup> ); N <sub>7</sub> (sp <sup>2.39</sup> ) |
| o,m,p,m'    | C <sub>1</sub> (sp <sup>2.03</sup> ); N <sub>7</sub> (sp <sup>2.39</sup> ) | C <sub>1</sub> (sp <sup>2.03</sup> ); N <sub>7</sub> (sp <sup>2.32</sup> ) | C <sub>1</sub> (sp <sup>2.03</sup> ); N <sub>7</sub> (sp <sup>2.30</sup> ) |
| o,m,m',o'   | C <sub>1</sub> (sp <sup>2.02</sup> ); N <sub>7</sub> (sp <sup>2.32</sup> ) | C <sub>1</sub> (sp <sup>2.03</sup> ); N <sub>7</sub> (sp <sup>2.23</sup> ) | C <sub>1</sub> (sp <sup>2.04</sup> ); N <sub>7</sub> (sp <sup>2.21</sup> ) |
| o,p,m',o'   | C <sub>1</sub> (sp <sup>2.02</sup> ); N <sub>7</sub> (sp <sup>2.39</sup> ) | C <sub>1</sub> (sp <sup>2.03</sup> ); N <sub>7</sub> (sp <sup>2.26</sup> ) | C <sub>1</sub> (sp <sup>2.03</sup> ); N <sub>7</sub> (sp <sup>2.23</sup> ) |
| o,m,p,m',o' | C <sub>1</sub> (sp <sup>2.01</sup> ); N <sub>7</sub> (sp <sup>2.36</sup> ) | C <sub>1</sub> (sp <sup>2.03</sup> ); N <sub>7</sub> (sp <sup>2.23</sup> ) | C <sub>1</sub> (sp <sup>2.05</sup> ); N <sub>7</sub> (sp <sup>2.20</sup> ) |

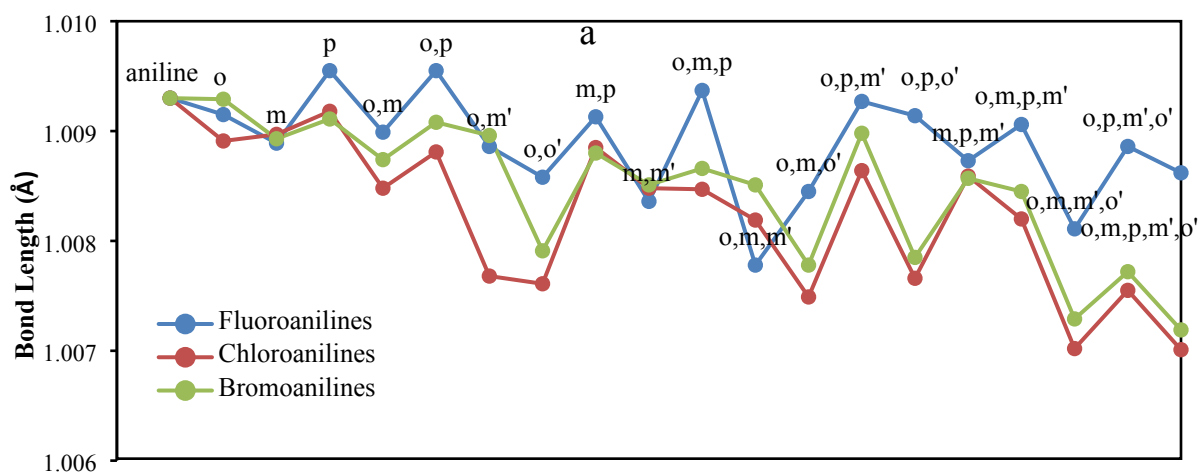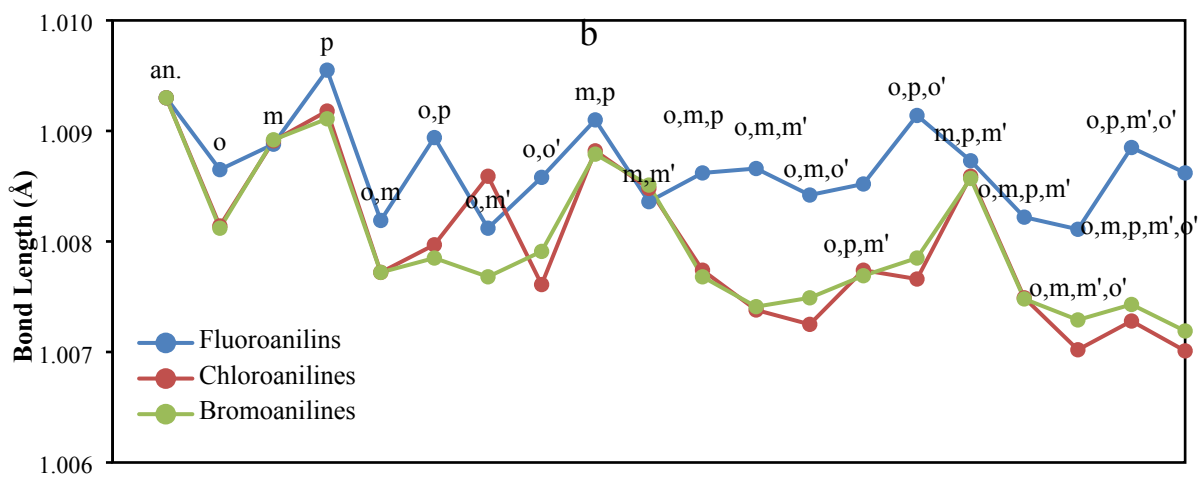

Figure S1: Optimized N-H bond lengths (Å) of H-atom at the side of the ring (a) with more halogen substituents and (b) with less halogen substituents for aniline, fluoroanilines, chloroanilines and bromoanilines.

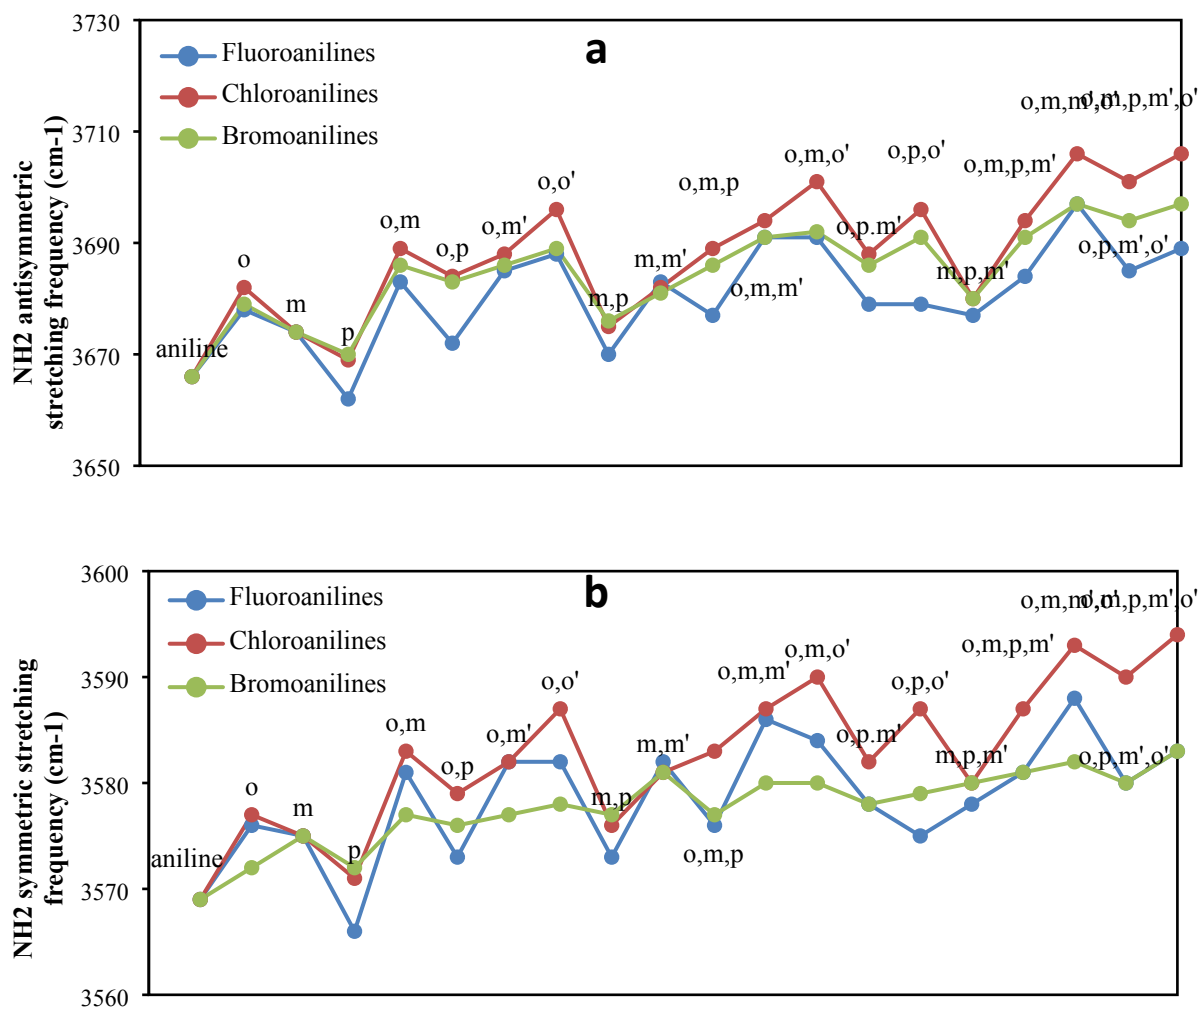

Figure S2: Calculated NH<sub>2</sub> (a) antisymmetric and (b) symmetric stretching vibrational frequencies (cm<sup>-1</sup>) for aniline, fluoroanilines, chloroanilines and bromoanilines

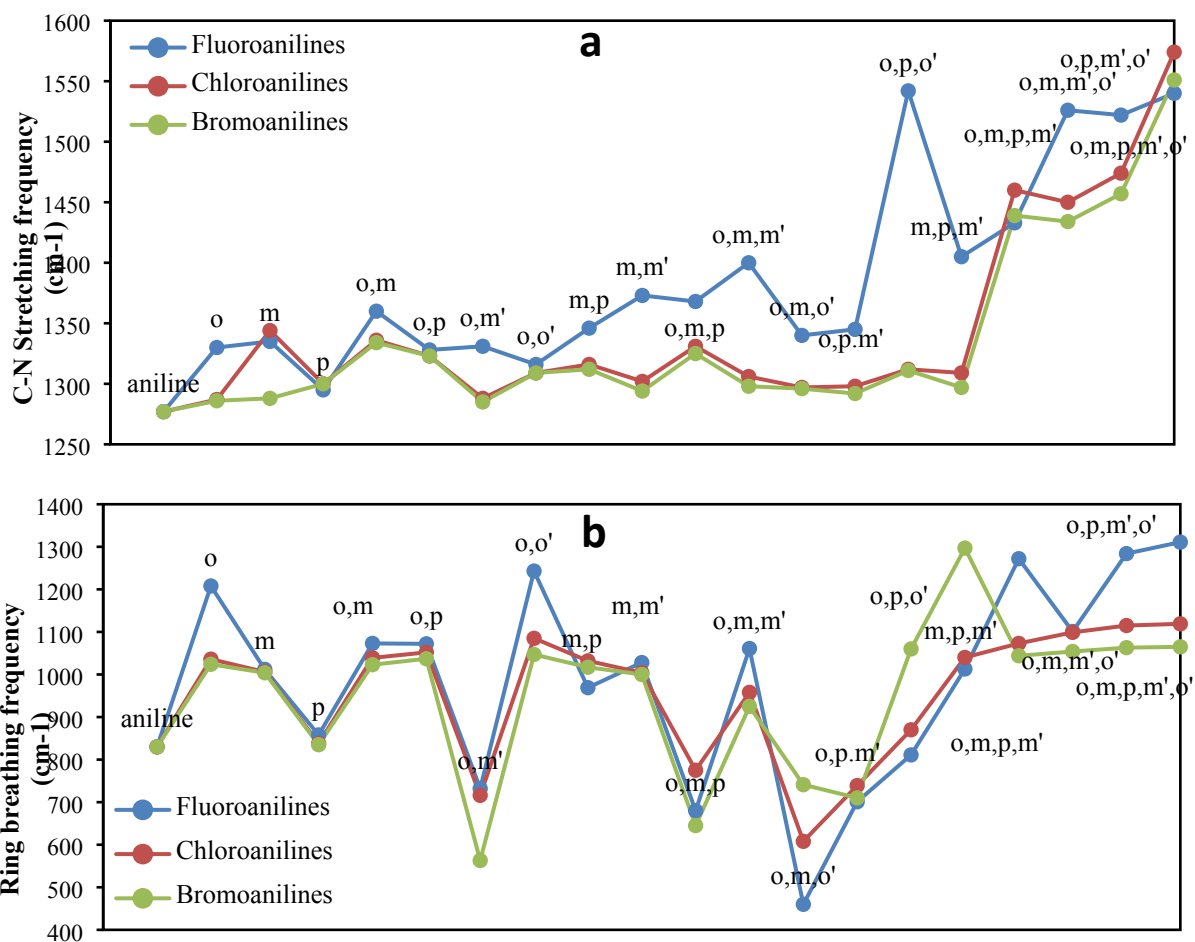

Figure S3: Calculated (a) C-N and (b) ring breathing vibrational frequencies (cm<sup>-1</sup>) for aniline, fluoroanilines, chloroanilines and bromoanilines

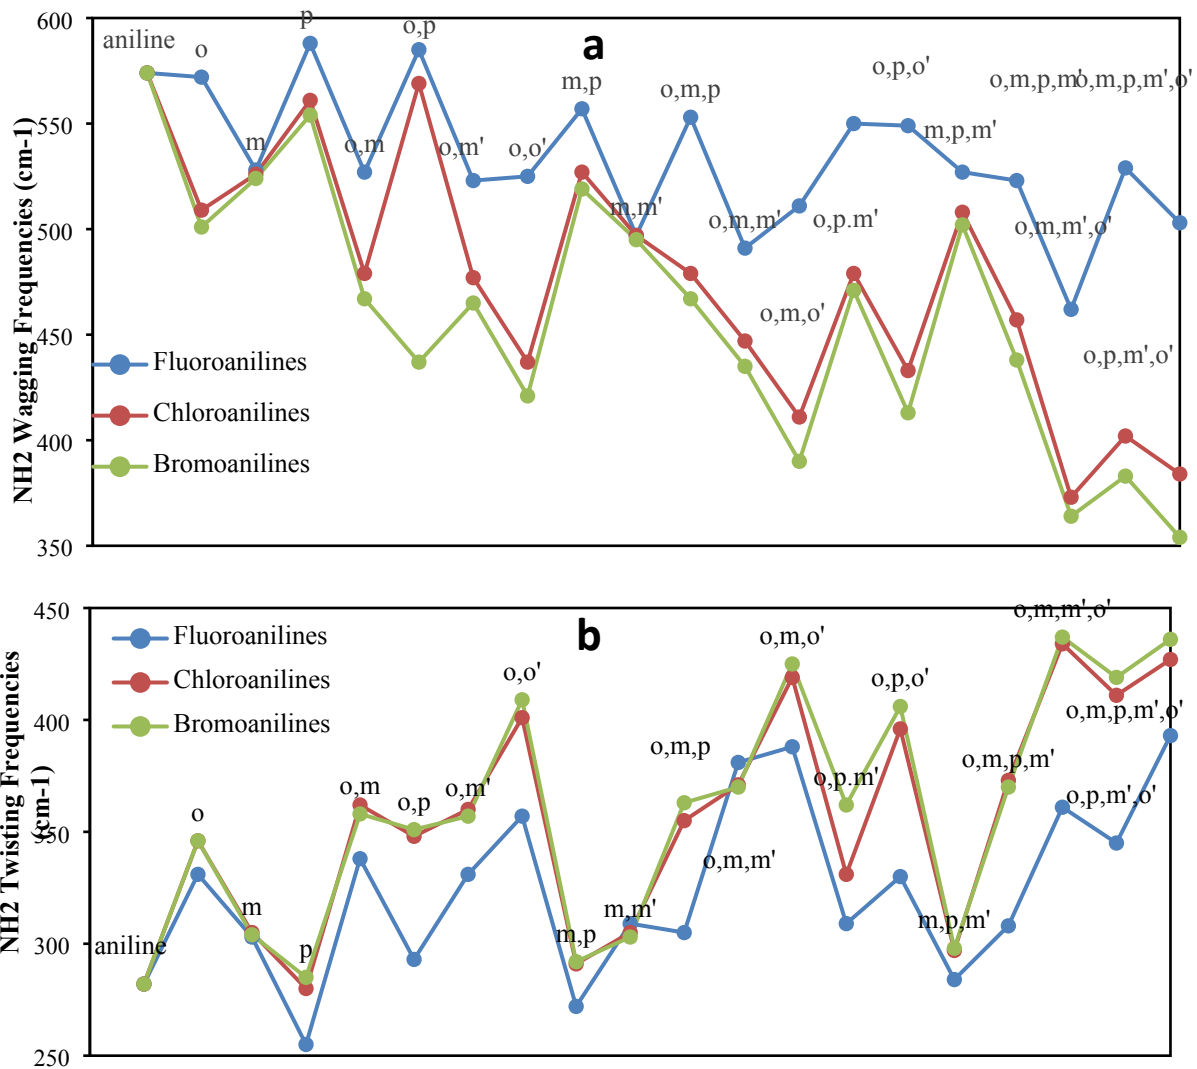

Figure S4: Calculated NH<sub>2</sub> (a) wagging and (b) twisting vibrational frequencies (cm<sup>-1</sup>) for aniline, fluoroanilines, chloroanilines and bromoanilines.

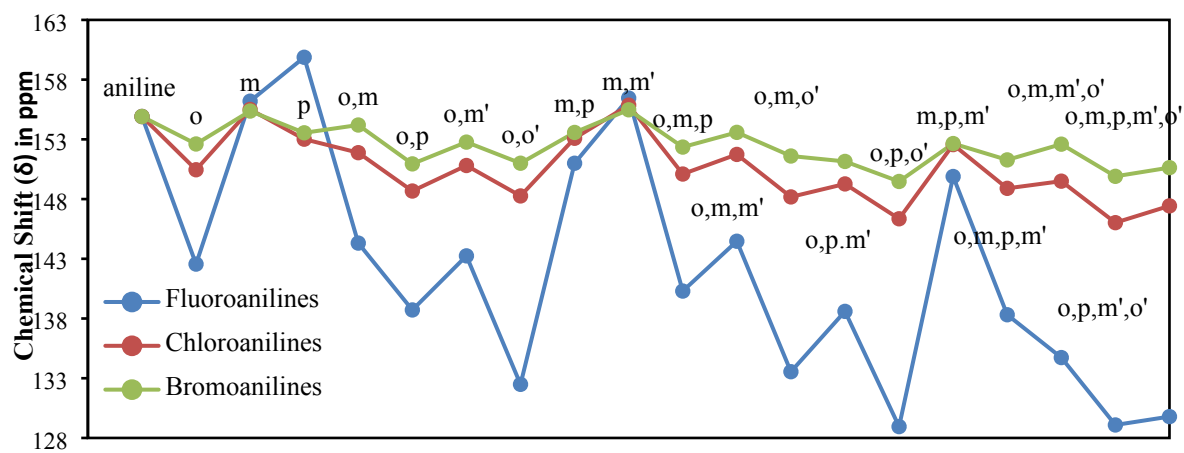

Figure S5:  $^{13}\text{C}$  chemical shift ( $\delta$ ) of  $\text{C}_1$  carbon atom of aniline, fluoroaniline, chloroaniline and bromoaniline derivatives.



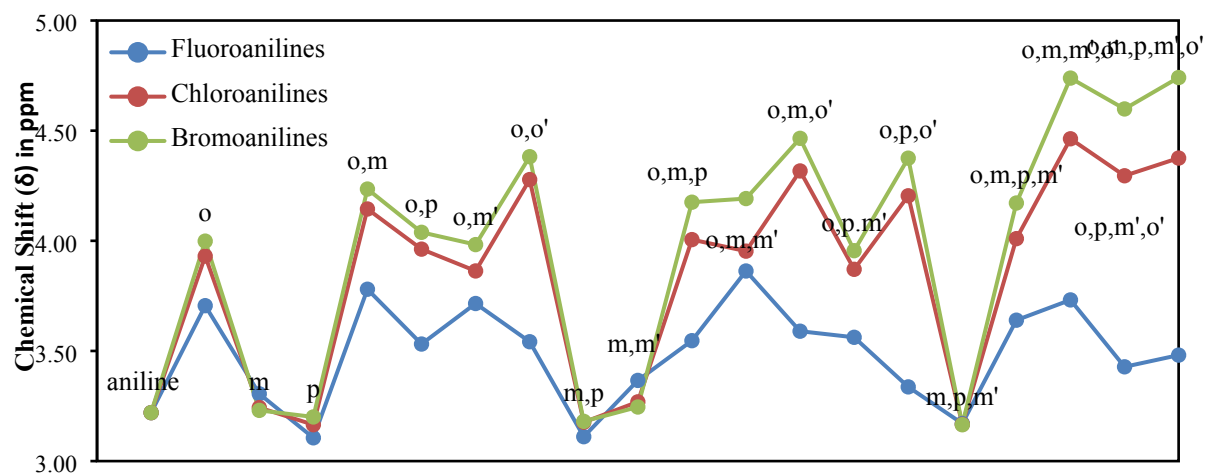

Figure S6: <sup>1</sup>H chemical shift (δ) of H<sub>13</sub> hydrogen atom of aniline, fluoroaniline, chloroaniline and bromoaniline derivatives.

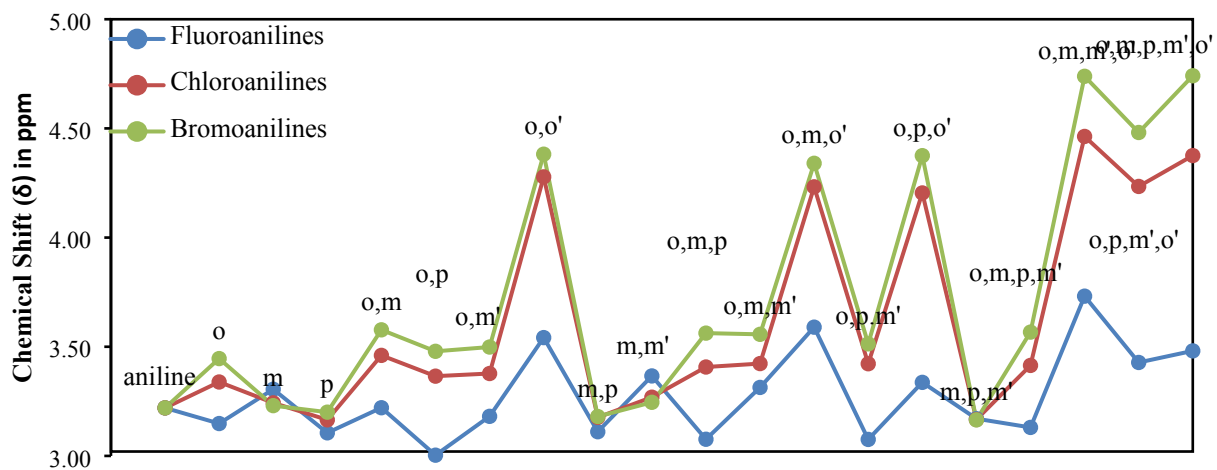

Figure S7:  $^1\text{H}$  chemical shift ( $\delta$ ) of  $\text{H}_{14}$  hydrogen atom of aniline, fluoroaniline, chloroaniline and bromoaniline derivatives.
